CORRECTION

# Correction: Effects of Two Chinese Herbal Formulae for the Treatment of Moderate to Severe Stable Chronic Obstructive Pulmonary Disease: A Multicenter, Double-Blind, Randomized Controlled Trial

Genfa Wang, Baojun Liu, Yuxue Cao, Yijie Du, Hongying Zhang, Qingli Luo, Bei Li, Jinfeng Wu, Yubao Lv, Jing Sun, Hualiang Jin, Kai Wei, Zhengxiao Zhao, Lingwen Kong, Xianmei Zhou, Qing Miao, Gang Wang, Qingwei Zhou, Jingcheng Dong

A reference is omitted from the seventh sentence of the first paragraph under the subheading “Outcome measures and follow-up” in the Methods.

The sentence should read: An adjudication committee whose members were unaware of the patients’ treatment assignments confirmed that all relapses met the study definition of relapse (Aaron et al., 2003).

The reference is: Aaron SD, Vandemheen KL, Hebert P, Dales R, Stiell IG, Ahuja J, et al. Outpatient Oral Prednisone after Emergency Treatment of Chronic Obstructive Pulmonary Disease. *N Engl J Med* 2003; 348:2618–25.

## Reference

1. Wang G, Liu B, Cao Y, Du Y, Zhang H, Luo Q, et al. (2014) Effects of Two Chinese Herbal Formulae for the Treatment of Moderate to Severe Stable Chronic Obstructive Pulmonary Disease: A Multicenter, Double-Blind, Randomized Controlled Trial. *PLoS ONE* 9(8): e103168. doi: [10.1371/journal.pone.0103168](https://doi.org/10.1371/journal.pone.0103168) PMID: [25118962](https://pubmed.ncbi.nlm.nih.gov/25118962/)

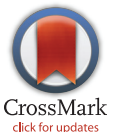

## OPEN ACCESS

**Citation:** Wang G, Liu B, Cao Y, Du Y, Zhang H, Luo Q, et al. (2016) Correction: Effects of Two Chinese Herbal Formulae for the Treatment of Moderate to Severe Stable Chronic Obstructive Pulmonary Disease: A Multicenter, Double-Blind, Randomized Controlled Trial. *PLoS ONE* 11(3): e0152379. doi:10.1371/journal.pone.0152379

**Published:** March 22, 2016

**Copyright:** © 2016 Wang et al. This is an open access article distributed under the terms of the [Creative Commons Attribution License](https://creativecommons.org/licenses/by/4.0/), which permits unrestricted use, distribution, and reproduction in any medium, provided the original author and source are credited.
